# Supplementary material
Source: PubMed Central journal article supplement (PMC3659937)
Supplement: supp_2012.068965_2012.068965.NOURAIE_SUPPL.pdf [file supp_2012.068965_2012.068965.NOURAIE_SUPPL.pdf]

# The relationship between the severity of hemolysis, clinical manifestations and risk of death in 415 patients with sickle cell anemia in the US and Europe

Mehdi Nouraie,<sup>1</sup> Janet S. Lee,<sup>2,3</sup> Yingze Zhang,<sup>2</sup> Tamir Kanias,<sup>2,3</sup> Xuejun Zhao,<sup>4</sup> Zeyu Xiong,<sup>2</sup> Timothy B. Oriss,<sup>3</sup> Qilu Zeng,<sup>2</sup> Gregory J. Kato,<sup>4</sup> J. Simon R. Gibbs,<sup>5</sup> Mariana E. Hildesheim,<sup>3</sup> Vandana Sachdev,<sup>4</sup> Robyn J. Barst,<sup>6</sup> Roberto F. Machado,<sup>7</sup> Kathryn L. Hassell,<sup>8</sup> Jane A. Little,<sup>9</sup> Dean E. Schraufnagel,<sup>7</sup> Lakshmanan Krishnamurti,<sup>10</sup> Enrico Novelli,<sup>2</sup> Reda E. Girgis,<sup>11</sup> Claudia R. Morris,<sup>12</sup> Erika Berman Rosenzweig,<sup>6</sup> David B. Badesch,<sup>8</sup> Sophie Lanzkron,<sup>11</sup> Oswaldo L. Castro,<sup>1</sup> Jonathan C. Goldsmith,<sup>13</sup> Victor R. Gordeuk,<sup>7\*</sup> and Mark T. Gladwin,<sup>2,3\*</sup> on behalf of the Walk-PHASST Investigators and Patients

<sup>1</sup>Howard University, Washington, USA; <sup>2</sup>Vascular Medicine Institute, University of Pittsburgh, USA; <sup>3</sup>Division of Pulmonary, Allergy and Critical Care Medicine, University of Pittsburgh, USA; <sup>4</sup>Cardiovascular and Pulmonary Medicine Branch, NHLBI, Bethesda, MD, USA; <sup>5</sup>National Heart & Lung Institute, Imperial College London, UK; <sup>6</sup>Columbia University, New York, USA; <sup>7</sup>University of Illinois, Chicago, IL, USA; <sup>8</sup>University of Colorado HSC, Denver, CO, USA; <sup>9</sup>Case Western Reserve University, Cleveland, OH, USA; <sup>10</sup>Children's Hospital of Pittsburgh, Pittsburgh, PA, USA; <sup>11</sup>Johns Hopkins University, Baltimore, MD, USA; <sup>12</sup>Children's Hospital & Research Center Oakland, Oakland, CA, USA; and <sup>13</sup>National Heart Lung and Blood Institute/NIH, Bethesda, MD, USA

©2013 Ferrata Storti Foundation. This is an open-access paper. doi:10.3324/haematol.2012.068965

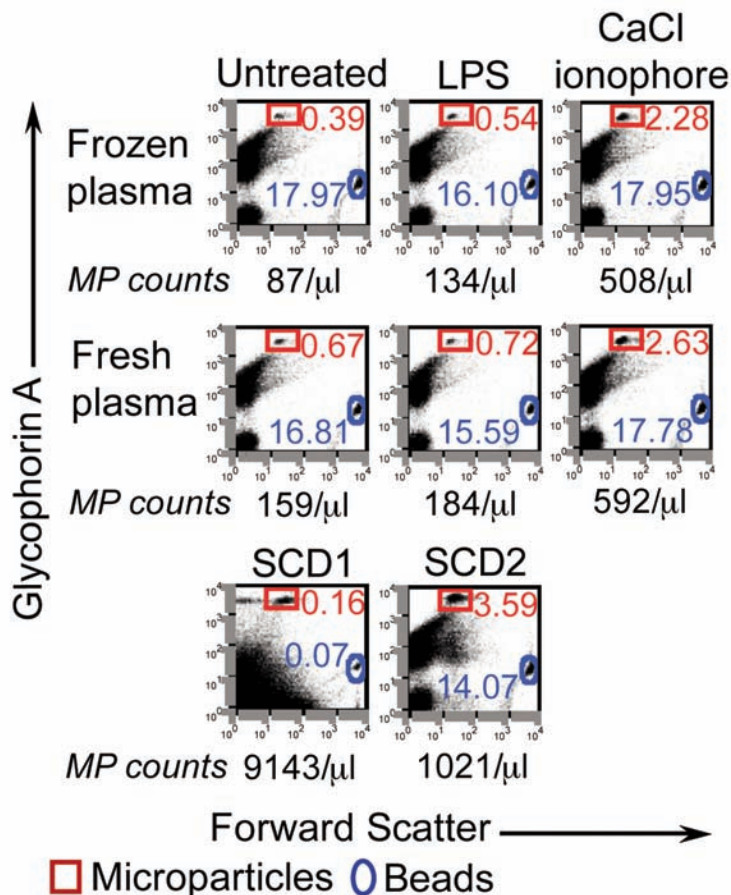

**Online Supplementary Figure S1.** Relative quantification of RBC microparticles comparing fresh and frozen plasma samples. RBC microparticles in platelet-poor plasma were enumerated using absolute count beads following ex vivo stimulation of whole blood obtained from a healthy volunteer at baseline (untreated), with LPS *E. coli* O11:B4 (10 ng/mL for 2 h), or calcium + ionophore (as positive control to induce microparticle formation). Microparticle counts are calculated according to their relative ratio to a known quantity of fluorescence micro beads spiked into each sample as depicted in the red and blue insets (% microparticles: % beads spiked into sample). Frozen and fresh plasma samples from the same healthy volunteer were assayed for microparticle counts in samples that were untreated or stimulated ex vivo with LPS, or CaCl<sub>2</sub> ionophore as shown. Fresh and previously frozen plasma sample from the same healthy volunteer showed a similar relationship across the 3 conditions (untreated, LPS, CaCl ionophore). Two samples from the walk-PHASST cohort (1) SCD1, patient with hyperhemolysis in hemolysis quartile 4 and (2) SCD2, patient with lower hemolysis quartile in quartile 1. SCD1 shows strikingly high MP counts (9,143/μL) compared with SCD2 (1021/μL), but both these samples were higher than baseline counts observed in the healthy volunteer (fresh, 159/μL vs frozen 87/μL). Red cell microparticles were defined as discrete, homogenous population of glycophorin A<sup>+</sup> events in the forward scatter range at least 1 log range below the size of absolute count fluorescence microbeads (~7.6 microns in diameter) spiked into each sample and indicated in the blue inset. Note the log scale of the x-axis, indicating that the red cell microparticles (shown in the GPA<sup>+</sup> inset, red rectangle) are less than 0.76 microns. Microparticle (MP) counts are shown below the x-axis. SCD1 and SCD2 represent frozen plasma samples from sickle cell disease patients that were thawed and assayed. Note the significant amount of glycophorin A events within the range of microparticles with SCD1 and SCD2 samples, compared to healthy volunteer. Events acquired with Beckman Coulter Gallios Flow Cytometer.

## References

1. Taylor JG, Nolan VG, Mendelsohn L, Kato GJ, Gladwin MT, Steinberg MH. Chronic hyper-hemolysis in sickle cell anemia: association of vascular complications and mortality with less frequent vasoocclusive pain. *PLoS ONE*. 2008;3(5):e2095.
