# Supplementary material
Source: PubMed Central journal article supplement (PMC3659937)
Supplement: supp_2012.068965_2012_068965-Contributions.pdf [file supp_2012.068965_2012_068965-Contributions.pdf]

**Manuscript no. HAEMATOL/2012/068965 entitled “The relationship between the severity of hemolysis, clinical manifestations and risk of death in 415 patients with sickle cell anemia in the US and Europe”**

**Authors: Mehdi Nouraie, Janet S. Lee, Yingze Zhang, Tamir Kanas, Xuejun Zhao, Zeyu Xiong, Timothy B. Oriss, Qilu Zeng, Gregory J. Kato, J. Simon R. Gibbs, Mariana E. Hildesheim, Vandana Sachdev, Robyn Barst, Roberto Machado, Kathryn L. Hassell, Jane A. Little, Dean E. Schraufnagel, Lakshmanan Krishnamurti, Enrico Novelli, Reda E. Girgis, Claudia Morris, Erika Berman Rosenzweig, David B. Badesch, Sophie Lanzkron, Oswaldo Castro, Jonathan C. Goldsmith, Victor Gordeuk, and Mark T. Gladwin**

**Information about the contributions of each person named as having participated in the study**

**1) Guarantor(s), i.e., person(s) who is (are) responsible for the integrity of the work as a whole:**

- Mehdi Nouraie, Howard University, Washington, DC; snouraie@Howard.edu
- Victor Gordeuk, University of Illinois, Chicago; vgordeuk@uic.edu
- Mark T. Gladwin, Vascular Medicine Institute, University of Pittsburgh; Division of Pulmonary Medicine, University of Pittsburgh; [gladwinmt@upmc.edu](mailto:gladwinmt@upmc.edu)

According to the International Committee of Medical Journal Editors (ICMJE) ([http://www.icmje.org/ethical\\_1author.html](http://www.icmje.org/ethical_1author.html)): “Authorship credit should be based on: 1) substantial contributions to conception and design, acquisition of data, or analysis and interpretation of data; 2) drafting the article or revising it critically for important intellectual content; and 3) final approval of the version to be published. Authors should meet conditions 1, 2, and 3 ..... Acquisition of funding, collection of data, or general supervision of the research group alone does not constitute authorship”.

The guarantors of this manuscript confirm that all persons designated as authors qualify for authorship, and that each author has participated sufficiently in the work to take public responsibility for appropriate portions of the content.

**2) Authors who participated in the conception of the study:**

- Mehdi Nouraie, Howard University, Washington, DC; snouraie@Howard.edu
- Victor Gordeuk, University of Illinois, Chicago; vgordeuk@uic.edu
- Mark T. Gladwin, Vascular Medicine Institute, University of Pittsburgh; Division of Pulmonary Medicine, University of Pittsburgh; [gladwinmt@upmc.edu](mailto:gladwinmt@upmc.edu)

**3) Design & Methods. The following authors were responsible for specific investigations:**

Mehdi Nouraie, Janet S. Lee, Yingze Zhang, Gregory J. Kato, J. Simon R. Gibbs, Mariana E. Hildesheim, Vandana Sachdev, Robyn Barst, Roberto Machado, Oswaldo Castro, Jonathan C. Goldsmith, Victor Gordeuk, and Mark T. Gladwin

**4) Results. The following authors were responsible for specific portions of the results, including figures and tables:**

Mehdi Nouraie, Janet S. Lee, Yingze Zhang, Tamir Kanas, Xuejun Zhao, Zeyu Xiong, Timothy B. Oriss, Qilu Zeng, Gregory J. Kato, J. Simon R. Gibbs, Mariana E. Hildesheim, Vandana Sachdev, Robyn Barst, Roberto Machado, Kathryn L. Hassell, Jane A. Little, Dean E. Schraufnagel, Lakshmanan Krishnamurti, Enrico Novelli, Reda E. Girgis, Claudia Morris, Erika Berman Rosenzweig, David B. Badesch, Sophie Lanzkron, Oswaldo Castro, Jonathan C. Goldsmith, Victor Gordeuk, and Mark T. Gladwin

**5) Writing the manuscript. The following authors were responsible for writing the manuscript:**

Mehdi Nouraie, Janet S. Lee, Yingze Zhang, Gregory J. Kato, J. Simon R. Gibbs, Mariana E. Hildesheim, Vandana Sachdev, Robyn Barst, Roberto Machado, Oswaldo Castro, Jonathan C. Goldsmith, Victor Gordeuk, and Mark T. Gladwin

**6) Contributors Listed in Acknowledgments:**

n/a
